# Supplementary material for: Fabrication of well-ordered silicon nanopillars embedded in a microchannel via metal-assisted chemical etching: a route towards an opto-mechanical biosensor
Source: Royal Society of Chemistry journal article supplement (doi:10.1039/c6ra15485a), 2016-01-01
Supplement: c6ra15485a1.pdf [file c6ra15485a1.pdf]

## Fabrication of well-ordered silicon nanopillars embedded in a microchannel via metal-assisted chemical etching: A route towards an opto-mechanical biosensor

V. Solís-Tinoco,<sup>a</sup> S. Marquez,<sup>a</sup> B. Sepúlveda<sup>a</sup> and L.M Lechuga<sup>a,\*</sup>

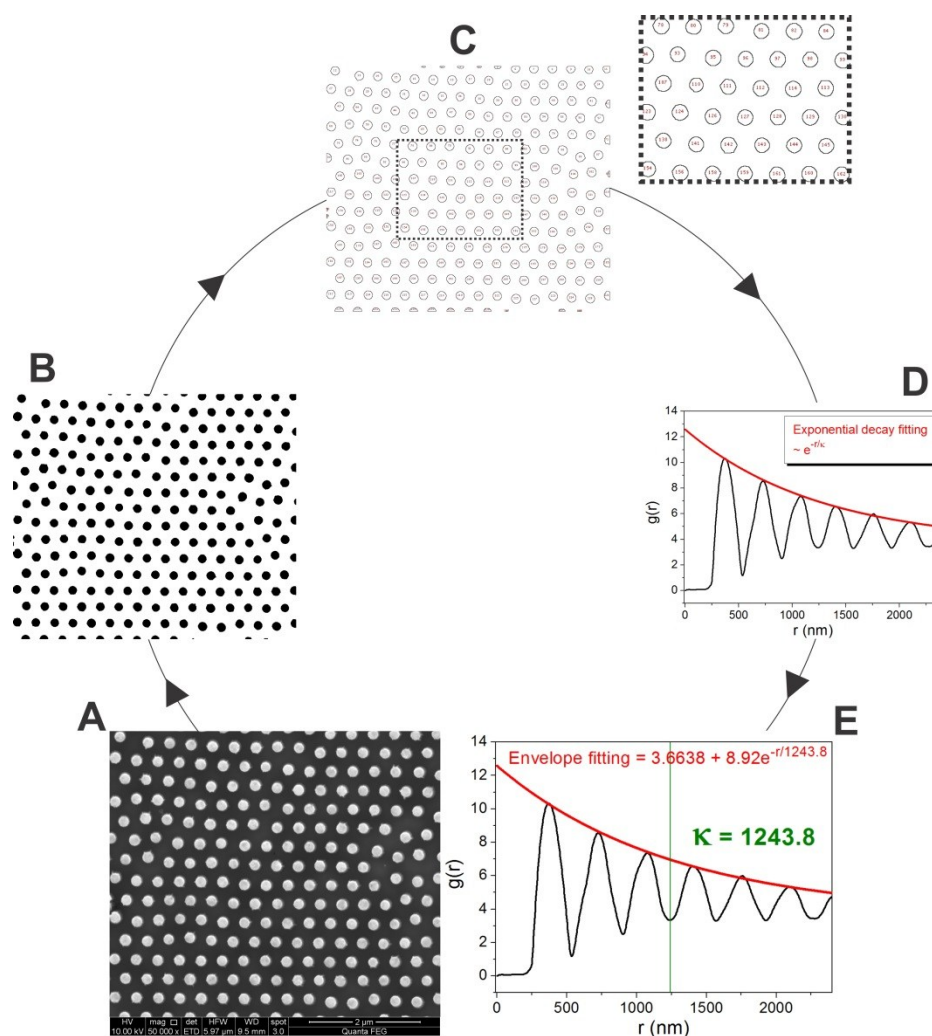

Fig. S1. (A) SEM image of SiNPs build inside the SU-8 microchannel (Top view). (B) Morphological operations of the SEM image to determine the location of the nanopillars. (C) Position assignment of the nanopillars using the Analyze particle tool of the ImageJ software [1]. (D) Calculation of the pair correlation function  $g(r)$  to determine the correlation length  $\kappa$  [2], [3] using the software R with the library "spatstat" [4]. (E) Fitting of the envelope of the pair correlation function by an exponential decay function ( $\exp(-r/\kappa)$ ) to calculate the correlation length.

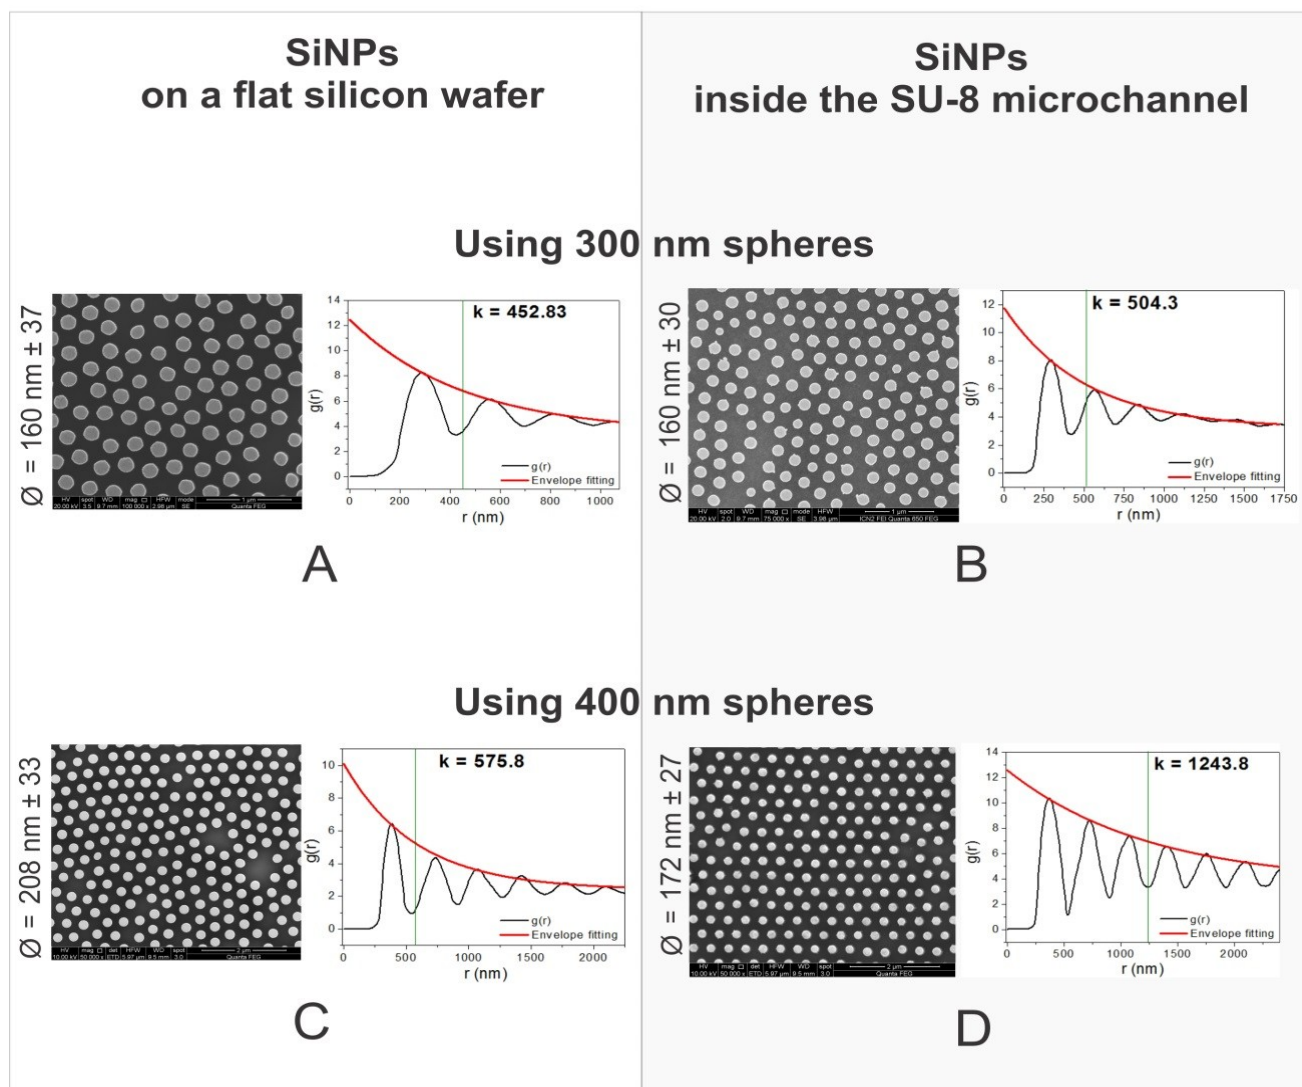

Fig. S2. Comparison of SiNPs fabricated inside the SU-8 microchannel with those built on a flat silicon wafer. For each image (*top view*) the correlation length was calculated demonstrating that the degree of ordering is preserved in those arrays of SiNPs contained in the microchannel. The RIE recipe for each case is: (A)70 s, (B)70 s, (C)100 s and (D)100 s, respectively.

- [1] Rasband, W.S., 'ImageJ, U.S. National Institutes of Health, Bethesda, Maryland, USA', 1997-2016. Available: <http://imagej.nih.gov/ij/>
- [2] C. Harrison, P. M. Chaikin, D. A. Huse, R. A. Register, D. H. Adamson, A. Daniel, E. Huang, P. Mansky, T. P. Russell, C. J. Hawker, D. A. Egolf, I. V. Melnikov, and E. Bodenschatz, 'Reducing Substrate Pinning of Block Copolymer Microdomains with a Buffer Layer of Polymer Brushes', *Macromolecules*, vol. 33, no. 3, pp. 857–865, 2000.
- [3] K. Aissou, T. Baron, M. Kogelschatz, M. D. Hertog, J. L. Rouvière, J.-M. Hartmann, and B. Pélissier, 'Fabrication of Well-Organized and Densely Packed Si Nanopillars Containing SiGe Nanodots by Using Block Copolymer Templates', *Chem. Mater.*, vol. 20, no. 19, pp. 6183–6188, 2008.
- [4] R Core Team, 'R: A language and environment for statistical computing. R Foundation for Statistical Computing, Vienna, Austria. ISBN 3-900051-07-0', 2016. Available: <http://www.R-project.org/>
